# Supplementary material for: Prenatal Exposure to Environmentally-Relevant Contaminants Perturbs Male Reproductive Parameters Across Multiple Generations that are Partially Protected by Folic Acid Supplementation
Source: PubMed Central journal article supplement (PMC6761122; doi:10.1038/s41598-019-50060-z), 2019-09-25

# Prenatal Exposure to Environmentally-Relevant Contaminants Perturbs Male Reproductive Parameters Across Multiple Generations that are Partially Protected by Folic Acid Supplementation.

Maryse Lessard<sup>1\*</sup>, Pauline M. Herst<sup>1\*</sup>, Phanie L. Charest<sup>1</sup>, Pauline Navarro<sup>2</sup>, Charles Joly-Beauparlant<sup>3</sup>, Arnaud Droit<sup>3</sup>, Sarah Kimmins<sup>4</sup>, Jacquetta Trasler<sup>5</sup>, Marie-Odile Benoit-Biancamano<sup>6</sup>, Amanda J. MacFarlane<sup>7</sup>, Mathieu Dalvai<sup>1</sup> and Janice L. Bailey<sup>1</sup>

**Supplementary Table 1.** Fold change of all shared significantly differentially expressed (DE) genes between POPs, FA and POPsFA in F2 (29 genes total), F3 (2 genes total) and F4 (288 genes total).

## F2

| Ensembl ID          | Official gene symbol | POPs  | FA   | POPsFA |
|---------------------|----------------------|-------|------|--------|
| ENSRNOG00000003160  | RragB                | 7.48  | 8.01 | 7.01   |
| ENSRNOG00000017100  | LOC108348078         | 9.81  | 6.46 | 7.21   |
| ENSRNOG000000026235 | Hk3                  | -6.05 | 4.51 | 3.48   |
| ENSRNOG00000017208  | Cspg4                | -5.91 | 5.69 | 4.69   |
| ENSRNOG00000010253  | Cd163                | -5.76 | 4.22 | 3.47   |
| ENSRNOG000000021424 | Cd300lf              | -5.00 | 2.63 | 2.29   |
| ENSRNOG000000033787 | Adamts15             | -4.80 | 3.25 | 2.53   |
| ENSRNOG000000027811 | Lilrb4               | -3.85 | 4.79 | 3.02   |
| ENSRNOG000000010183 | Fam198b              | -3.58 | 3.65 | 2.91   |
| ENSRNOG000000021161 | Fermt3               | -3.42 | 3.97 | 2.84   |
| ENSRNOG00000016294  | Cd4                  | -3.32 | 3.13 | 2.27   |
| ENSRNOG000000053260 | Lilrb3a              | -3.04 | 2.90 | 2.34   |
| ENSRNOG000000050430 | Vav1                 | -2.87 | 3.38 | 2.30   |
| ENSRNOG00000016512  | Sema3b               | -2.77 | 2.14 | 2.23   |
| ENSRNOG000000046663 | LOC100911825         | -2.64 | 4.37 | 3.05   |
| ENSRNOG000000039390 | Slc37a2              | -2.63 | 3.17 | 2.08   |
| ENSRNOG00000012749  | C1qb                 | -2.56 | 3.55 | 2.77   |
| ENSRNOG000000012807 | C1qa                 | -2.55 | 3.51 | 2.55   |
| ENSRNOG000000028668 | Slc28a2              | -2.47 | 3.54 | 2.78   |
| ENSRNOG000000003622 | Cybb                 | -2.45 | 3.76 | 2.73   |
| ENSRNOG000000006094 | Cd44                 | -2.44 | 3.78 | 2.87   |
| ENSRNOG000000033564 | Cfd                  | -2.42 | 4.53 | 3.53   |
| ENSRNOG000000025001 | Pcolce               | -2.39 | 2.28 | 2.79   |
| ENSRNOG000000005825 | Lyz2                 | -2.34 | 3.52 | 2.64   |
| ENSRNOG000000009848 | Il18                 | -2.26 | 2.62 | 2.02   |

|                     |        |       |      |      |
|---------------------|--------|-------|------|------|
| ENSRNOG00000009822  | Tlr2   | -2.19 | 2.59 | 2.02 |
| ENSRNOG000000054251 | Clec7a | -2.12 | 3.48 | 2.60 |
| ENSRNOG000000052219 | Gm2a   | -2.07 | 2.98 | 2.72 |
| ENSRNOG000000019890 | Folr2  | -2.05 | 5.07 | 4.07 |

---

**F3**

---

| <b>Ensembl ID</b>  | <b>Official gene symbol</b> | <b>POPs</b> | <b>FA</b> | <b>POPsFA</b> |
|--------------------|-----------------------------|-------------|-----------|---------------|
| ENSRNOG00000006368 | Lrrn3                       | -4.12       | -3.16     | -3.39         |
| ENSRNOG00000030183 | Plod2                       | -3.64       | -3.87     | -3.23         |

---

F4

| Ensembl ID         | Official gene symbol | POPs   | FA     | POPsFA |
|--------------------|----------------------|--------|--------|--------|
| ENSRNOG00000047388 | Vom2r4               | -11.21 | -10.39 | -11.00 |
| ENSRNOG00000050370 | Vom2r6               | -9.22  | -10.22 | -10.27 |
| ENSRNOG00000012057 | Olig3                | -9.40  | -9.75  | -8.73  |
| ENSRNOG00000016421 | Tyr                  | -10.53 | -9.72  | -10.55 |
| ENSRNOG00000060573 | AABR07004437.1       | -7.29  | -9.28  | -7.48  |
| ENSRNOG00000002167 | Dmp1                 | -8.28  | -9.25  | -10.31 |
| ENSRNOG00000032626 | Mmp3                 | -7.89  | -9.18  | -7.76  |
| ENSRNOG00000051929 | Phox2b               | -6.92  | -9.17  | -9.54  |
| ENSRNOG00000054957 | Sfrp4                | -9.54  | -8.85  | -13.34 |
| ENSRNOG00000019377 | Amh                  | -7.75  | -8.84  | -8.44  |
| ENSRNOG00000021108 | Slc22a12             | -9.13  | -8.79  | -9.11  |
| ENSRNOG00000058285 | Nme8                 | -8.47  | -8.44  | -8.62  |
| ENSRNOG00000012671 | Gan                  | -8.03  | -8.23  | -9.21  |
| ENSRNOG00000048390 | AABR07006536.1       | -8.25  | -7.86  | -8.31  |
| ENSRNOG00000058560 | Col2a1               | -7.66  | -7.82  | -7.47  |
| ENSRNOG00000054716 | AABR07015907.1       | -7.44  | -7.70  | -8.40  |
| ENSRNOG00000051678 | AABR07012475.1       | -8.95  | -7.70  | -7.93  |
| ENSRNOG00000053805 | Akain1               | -8.18  | -7.70  | -8.50  |
| ENSRNOG00000011892 | Slc36a2              | -7.78  | -7.49  | -6.17  |
| ENSRNOG00000047891 | Foxg1                | -6.62  | -7.40  | -7.28  |
| ENSRNOG00000024904 | Pla2g4e              | -6.79  | -7.34  | -9.46  |
| ENSRNOG00000032745 | Slc17a3              | -6.62  | -7.22  | -7.61  |
| ENSRNOG00000049019 | Tmem170a             | -7.04  | -7.19  | -7.08  |
| ENSRNOG00000016362 | Gpr4                 | -8.13  | -7.14  | -8.13  |
| ENSRNOG00000057392 | AABR07042859.1       | -9.31  | -7.06  | -9.80  |
| ENSRNOG00000022044 | Cabp4                | -7.25  | -6.92  | -6.03  |
| ENSRNOG00000046611 | Dzip1-ps1            | -7.97  | -6.87  | -6.77  |
| ENSRNOG00000045689 | AABR07037645.1       | -8.15  | -6.87  | -7.28  |
| ENSRNOG00000057463 | AABR07008293.4       | -7.96  | -6.85  | -7.95  |
| ENSRNOG00000000196 | Cyp19a1              | -7.21  | -6.82  | -7.57  |
| ENSRNOG00000006741 | Podnl1               | -7.37  | -6.79  | -7.27  |
| ENSRNOG00000029876 | Gucy1a2              | -7.33  | -6.74  | -6.39  |
| ENSRNOG00000042897 | Nmrk2                | -6.84  | -6.63  | -7.06  |
| ENSRNOG00000042222 | RGD1563562           | -7.68  | -6.63  | -8.01  |
| ENSRNOG00000012428 | Maf                  | -6.41  | -6.61  | -7.18  |
| ENSRNOG00000033883 | Stard8               | -6.62  | -6.58  | -6.43  |
| ENSRNOG00000038068 | Pcdh9                | -8.36  | -6.58  | -7.43  |
| ENSRNOG00000006776 | Smyd1                | -7.31  | -6.54  | -7.59  |

|                    |                |       |       |       |
|--------------------|----------------|-------|-------|-------|
| ENSRNOG00000059091 | Potem          | -8.65 | -6.51 | -6.77 |
| ENSRNOG00000052093 | Smok2a         | -7.48 | -6.38 | -6.96 |
| ENSRNOG00000049504 | AABR07009221.1 | -7.04 | -6.35 | -7.32 |
| ENSRNOG00000017333 | Syt4           | -9.97 | -6.35 | -6.06 |
| ENSRNOG00000020097 | Inha           | -6.73 | -6.33 | -6.65 |
| ENSRNOG00000018286 | Chrna1         | -6.24 | -6.30 | -6.78 |
| ENSRNOG00000008121 | Slc13a1        | -5.73 | -6.28 | -5.58 |
| ENSRNOG00000015002 | Abhd15         | -5.69 | -6.26 | -6.98 |
| ENSRNOG00000045797 | Lep            | -6.50 | -6.24 | -6.25 |
| ENSRNOG00000051598 | AABR07013583.1 | -7.11 | -6.19 | -7.28 |
| ENSRNOG00000004679 | Fign           | -7.41 | -6.17 | -4.89 |
| ENSRNOG00000032706 | Kcnk18         | -6.61 | -6.16 | -6.19 |
| ENSRNOG00000055570 | AABR07034940.2 | -5.86 | -6.15 | -6.23 |
| ENSRNOG00000030156 | LOC102547344   | -8.42 | -6.12 | -7.41 |
| ENSRNOG00000049016 | AABR07048012.1 | -7.43 | -6.11 | -7.02 |
| ENSRNOG00000049451 | AABR07048013.1 | -7.43 | -6.11 | -7.02 |
| ENSRNOG00000010348 | Cacna1f        | -6.64 | -6.10 | -5.26 |
| ENSRNOG00000046711 | AC128353.1     | -5.89 | -6.05 | -6.99 |
| ENSRNOG00000057039 | AC124874.1     | -7.41 | -6.04 | -7.39 |
| ENSRNOG00000003997 | Pld5           | -5.72 | -6.02 | -5.32 |
| ENSRNOG00000037435 | Tmem196        | -5.28 | -6.02 | -5.49 |
| ENSRNOG00000032558 | AABR07030263.1 | -5.89 | -6.01 | -6.96 |
| ENSRNOG00000060832 | AC240408.2     | -7.20 | -5.98 | -7.23 |
| ENSRNOG00000032002 | Hapln1         | -6.22 | -5.97 | -6.58 |
| ENSRNOG00000042535 | AABR07010907.1 | -7.34 | -5.97 | -6.66 |
| ENSRNOG00000054519 | AABR07053179.1 | -7.32 | -5.97 | -7.27 |
| ENSRNOG00000014253 | Pax2           | -6.58 | -5.95 | -6.30 |
| ENSRNOG00000019193 | Stx1b          | -6.38 | -5.94 | -6.39 |
| ENSRNOG00000050847 | AABR07027902.1 | -7.00 | -5.94 | -6.99 |
| ENSRNOG00000051648 | AABR07016566.1 | -5.98 | -5.90 | -6.39 |
| ENSRNOG00000059400 | AABR07070796.1 | -7.53 | -5.85 | -7.20 |
| ENSRNOG00000058491 | AABR07017104.1 | -7.09 | -5.83 | -7.07 |
| ENSRNOG00000057038 | AABR07029803.1 | -7.78 | -5.82 | -6.94 |
| ENSRNOG00000016679 | Tmc7           | -6.71 | -5.74 | -6.11 |
| ENSRNOG00000017686 | Pi15           | -7.39 | -5.73 | -6.56 |
| ENSRNOG00000014871 | Zic4           | -5.29 | -5.73 | -5.95 |
| ENSRNOG00000008431 | Gabbr2         | -6.36 | -5.73 | -6.38 |
| ENSRNOG00000010106 | Faxc           | -6.31 | -5.70 | -6.39 |
| ENSRNOG00000017197 | Pdgfb          | -5.74 | -5.69 | -4.91 |
| ENSRNOG00000003899 | Krt14          | -7.03 | -5.69 | -5.42 |
| ENSRNOG00000045560 | Gvin1          | -4.90 | -5.67 | -6.26 |
| ENSRNOG00000007942 | Fscn3          | -6.26 | -5.67 | -5.70 |
| ENSRNOG00000031879 | AABR07026048.1 | -5.86 | -5.67 | -5.27 |
| ENSRNOG00000000871 | Cd40lg         | -5.83 | -5.67 | -5.88 |

|                    |                |       |       |       |
|--------------------|----------------|-------|-------|-------|
| ENSRNOG00000052460 | AABR07004812.2 | -6.58 | -5.63 | -6.82 |
| ENSRNOG00000058101 | AABR07067387.1 | -6.72 | -5.62 | -6.73 |
| ENSRNOG00000024789 | LOC499219      | -6.59 | -5.48 | -6.49 |
| ENSRNOG00000008053 | Atp8a2         | -5.35 | -5.46 | -5.18 |
| ENSRNOG00000053122 | Scn1a          | -5.74 | -5.43 | -6.83 |
| ENSRNOG00000053229 | AABR07007905.2 | -6.64 | -5.38 | -6.41 |
| ENSRNOG00000013312 | Kcnt2          | -4.65 | -5.38 | -4.57 |
| ENSRNOG00000005749 | Foxred2        | -5.85 | -5.37 | -6.10 |
| ENSRNOG00000010834 | Mpped1         | -5.73 | -5.32 | -6.30 |
| ENSRNOG00000030266 | Plekhg2        | -4.98 | -5.28 | -6.12 |
| ENSRNOG00000004623 | Rag2           | -5.81 | -5.27 | -6.51 |
| ENSRNOG00000002624 | Edaradd        | -6.06 | -5.24 | -5.14 |
| ENSRNOG00000010478 | LOC299282      | -6.47 | -5.23 | -6.18 |
| ENSRNOG00000026302 | Lrrn4cl        | -5.86 | -5.22 | -5.99 |
| ENSRNOG00000047671 | AABR07060588.2 | -5.79 | -5.21 | -6.22 |
| ENSRNOG00000042860 | Pappa2         | -6.91 | -5.20 | -4.73 |
| ENSRNOG00000038369 | AABR07038477.1 | -5.02 | -5.19 | -5.65 |
| ENSRNOG00000002265 | Casr           | -6.21 | -5.19 | -6.06 |
| ENSRNOG00000055846 | AABR07013065.1 | -6.23 | -5.12 | -6.11 |
| ENSRNOG00000060553 | AC240408.1     | -5.67 | -5.11 | -6.33 |
| ENSRNOG00000012165 | Ccdc129        | -5.45 | -5.10 | -6.52 |
| ENSRNOG00000008644 | Nkx2-1         | -6.20 | -5.09 | -6.17 |
| ENSRNOG00000057092 | Slfn4          | -4.61 | -5.06 | -6.71 |
| ENSRNOG00000049140 | AABR07060678.1 | -6.14 | -5.06 | -6.13 |
| ENSRNOG00000056033 | AC111632.2     | -6.02 | -5.03 | -6.10 |
| ENSRNOG00000011258 | Masp2          | -4.80 | -5.03 | -4.91 |
| ENSRNOG00000058277 | AC080157.1     | -5.55 | -4.98 | -5.53 |
| ENSRNOG00000028112 | LOC499796      | -6.01 | -4.97 | -6.84 |
| ENSRNOG00000060618 | AABR07027267.1 | -5.72 | -4.95 | -5.89 |
| ENSRNOG00000059691 | AABR07033318.1 | -5.77 | -4.95 | -5.73 |
| ENSRNOG00000002723 | Sele           | -5.58 | -4.93 | -6.53 |
| ENSRNOG00000010798 | Blk            | -5.42 | -4.93 | -5.79 |
| ENSRNOG00000016760 | Kctd19         | -4.81 | -4.90 | -4.69 |
| ENSRNOG00000047765 | AABR07010682.1 | -5.93 | -4.89 | -5.95 |
| ENSRNOG00000036661 | Rab40b         | -5.54 | -4.89 | -4.43 |
| ENSRNOG00000012920 | Col9a1         | -5.36 | -4.88 | -5.27 |
| ENSRNOG00000061900 | AABR07047771.1 | -5.62 | -4.88 | -5.86 |
| ENSRNOG00000011177 | Sftpc          | -5.54 | -4.86 | -5.49 |
| ENSRNOG00000051345 | AABR07048469.2 | -5.20 | -4.86 | -4.91 |
| ENSRNOG00000040314 | AABR07034637.1 | -5.88 | -4.85 | -5.88 |
| ENSRNOG00000008050 | Stac3          | -4.16 | -4.85 | -5.25 |
| ENSRNOG00000008367 | Krt86          | -5.60 | -4.84 | -5.90 |
| ENSRNOG00000034226 | LOC100362981   | -6.80 | -4.84 | -6.42 |
| ENSRNOG00000057744 | AC112355.1     | -5.37 | -4.83 | -5.60 |

|                    |                |       |       |       |
|--------------------|----------------|-------|-------|-------|
| ENSRNOG00000000618 | Mdga2          | -5.52 | -4.83 | -4.63 |
| ENSRNOG00000022565 | Lrrc25         | -5.45 | -4.80 | -5.33 |
| ENSRNOG00000053741 | AABR07052664.1 | -5.73 | -4.78 | -5.57 |
| ENSRNOG00000010128 | Slc27a2        | -4.35 | -4.76 | -4.70 |
| ENSRNOG00000061132 | LOC103694210   | -5.44 | -4.75 | -5.74 |
| ENSRNOG00000011068 | Papss2         | -5.58 | -4.75 | -5.78 |
| ENSRNOG00000050885 | Sult1c2        | -4.73 | -4.72 | -3.18 |
| ENSRNOG00000032995 | AABR07025089.1 | -5.83 | -4.68 | -5.51 |
| ENSRNOG00000052774 | AC123253.2     | -5.38 | -4.65 | -5.60 |
| ENSRNOG00000031202 | Trim30c        | -5.58 | -4.62 | -5.67 |
| ENSRNOG00000029588 | LOC100364769   | -5.51 | -4.62 | -5.62 |
| ENSRNOG00000017890 | Crhbp          | -4.65 | -4.61 | -5.24 |
| ENSRNOG00000030538 | Slco1b2        | -5.21 | -4.61 | -5.54 |
| ENSRNOG00000055015 | AABR07015559.1 | -5.86 | -4.59 | -5.31 |
| ENSRNOG00000043357 | Zfp407         | -4.47 | -4.58 | -4.91 |
| ENSRNOG00000024390 | Osm            | -5.84 | -4.58 | -6.30 |
| ENSRNOG00000024569 | Gimap9         | -4.99 | -4.57 | -5.17 |
| ENSRNOG00000030689 | Ms4a6e         | -5.28 | -4.57 | -5.55 |
| ENSRNOG00000046547 | Rbm24          | -3.73 | -4.55 | -3.87 |
| ENSRNOG00000049791 | AABR07059552.1 | -5.99 | -4.55 | -5.62 |
| ENSRNOG00000025235 | Tmem130        | -5.09 | -4.54 | -4.31 |
| ENSRNOG00000028908 | Eppin          | -4.38 | -4.54 | -4.62 |
| ENSRNOG00000059027 | AC098008.5     | -5.73 | -4.53 | -5.37 |
| ENSRNOG00000026238 | RGD1562618     | -4.43 | -4.51 | -4.66 |
| ENSRNOG00000007307 | Syde1          | -4.86 | -4.51 | -5.54 |
| ENSRNOG00000048305 | AABR07013922.1 | -6.16 | -4.50 | -5.44 |
| ENSRNOG00000058003 | Spon1          | -5.00 | -4.50 | -5.51 |
| ENSRNOG00000000378 | AABR07044914.1 | -5.38 | -4.50 | -5.50 |
| ENSRNOG00000062191 | AABR07036016.1 | -4.98 | -4.49 | -4.45 |
| ENSRNOG00000008587 | Tek            | -6.50 | -4.49 | -6.12 |
| ENSRNOG00000004459 | Sdr9c7         | -5.24 | -4.48 | -5.21 |
| ENSRNOG00000047234 | AABR07057530.1 | -4.87 | -4.48 | -4.73 |
| ENSRNOG00000048917 | Hoxa6          | -3.84 | -4.46 | -4.24 |
| ENSRNOG00000058209 | AABR07063893.1 | -5.80 | -4.46 | -5.61 |
| ENSRNOG00000059506 | AC124926.2     | -5.67 | -4.45 | -5.55 |
| ENSRNOG00000052264 | AABR07034393.1 | -6.17 | -4.44 | -5.02 |
| ENSRNOG00000059362 | Has3           | -4.66 | -4.43 | -4.35 |
| ENSRNOG00000010997 | Ednrb          | -4.79 | -4.43 | -5.29 |
| ENSRNOG00000058984 | AC115181.1     | -5.29 | -4.42 | -5.15 |
| ENSRNOG00000046774 | AABR07045307.1 | -5.55 | -4.41 | -5.73 |
| ENSRNOG00000061874 | AABR07047036.1 | -5.32 | -4.39 | -5.31 |
| ENSRNOG00000013373 | Rmt1           | -4.81 | -4.38 | -4.35 |
| ENSRNOG00000015691 | Fam212b        | -4.64 | -4.38 | -4.64 |
| ENSRNOG00000015538 | Abcd2          | -5.29 | -4.33 | -5.08 |

|                    |                |       |       |       |
|--------------------|----------------|-------|-------|-------|
| ENSRNOG00000061625 | AABR07048698.1 | -5.46 | -4.33 | -5.34 |
| ENSRNOG00000053337 | Ly49s6         | -5.48 | -4.31 | -5.47 |
| ENSRNOG00000028072 | Chit1          | -4.88 | -4.30 | -5.25 |
| ENSRNOG00000042471 | RGD1560324     | -5.63 | -4.28 | -5.34 |
| ENSRNOG00000017833 | Actn2          | -3.86 | -4.27 | -4.72 |
| ENSRNOG00000007059 | Atp1b4         | -4.74 | -4.24 | -4.90 |
| ENSRNOG00000007664 | Tnfrsf13c      | -4.33 | -4.21 | -4.64 |
| ENSRNOG00000060489 | AABR07015639.1 | -5.16 | -4.21 | -5.28 |
| ENSRNOG00000001189 | Sik1           | -4.07 | -4.20 | -4.72 |
| ENSRNOG00000037684 | RGD1566159     | -4.27 | -4.19 | -4.66 |
| ENSRNOG00000039593 | Ecsr           | -4.02 | -4.18 | -4.00 |
| ENSRNOG00000050966 | AABR07024757.1 | -5.38 | -4.18 | -5.22 |
| ENSRNOG00000059468 | AABR07034573.3 | -4.87 | -4.17 | -4.96 |
| ENSRNOG00000008074 | Cyp11a1        | -3.94 | -4.17 | -3.63 |
| ENSRNOG00000054385 | Rhebl1         | -3.92 | -4.16 | -3.71 |
| ENSRNOG00000049314 | AABR07069524.1 | -4.91 | -4.15 | -4.97 |
| ENSRNOG00000059786 | AC107531.3     | -4.39 | -4.12 | -4.48 |
| ENSRNOG00000056490 | AABR07013566.1 | -5.31 | -4.11 | -4.99 |
| ENSRNOG00000010853 | Chrna7         | -4.49 | -4.11 | -4.45 |
| ENSRNOG00000061264 | AABR07058091.2 | -4.35 | -4.09 | -4.69 |
| ENSRNOG00000008842 | Cyp4a8         | -4.63 | -4.07 | -4.69 |
| ENSRNOG00000024482 | Tnrc18         | -4.36 | -4.04 | -4.08 |
| ENSRNOG00000009043 | Piwil4         | -4.10 | -4.04 | -4.06 |
| ENSRNOG00000022022 | AC128967.1     | -4.71 | -4.04 | -4.71 |
| ENSRNOG00000053367 | AABR07064257.1 | -4.71 | -4.03 | -4.94 |
| ENSRNOG00000047635 | Tmem178b       | -4.01 | -4.03 | -5.38 |
| ENSRNOG00000060246 | Klrd1          | -4.77 | -4.02 | -4.67 |
| ENSRNOG00000003669 | Myocd          | -4.64 | -3.99 | -4.82 |
| ENSRNOG00000037452 | AABR07042542.1 | -5.11 | -3.99 | -5.02 |
| ENSRNOG00000046505 | Bend3          | -3.72 | -3.99 | -4.19 |
| ENSRNOG00000043188 | AABR07000261.1 | -4.12 | -3.99 | -4.50 |
| ENSRNOG00000019057 | Prkcq          | -4.22 | -3.97 | -5.66 |
| ENSRNOG00000037449 | Pole           | -3.67 | -3.97 | -3.92 |
| ENSRNOG00000037997 | Tssk2          | -4.32 | -3.97 | -4.33 |
| ENSRNOG00000058653 | Tmem52b        | -3.89 | -3.97 | -4.35 |
| ENSRNOG00000050509 | Ebi3           | -3.36 | -3.95 | -4.01 |
| ENSRNOG00000060946 | LOC100910506   | -4.39 | -3.89 | -4.09 |
| ENSRNOG00000032361 | AABR07038798.1 | -4.47 | -3.88 | -4.48 |
| ENSRNOG00000009832 | Slc39a14       | -3.74 | -3.88 | -3.80 |
| ENSRNOG00000056187 | AC132752.1     | -4.44 | -3.88 | -4.47 |
| ENSRNOG00000021663 | RGD1561849     | -4.01 | -3.87 | -3.56 |
| ENSRNOG00000000010 | Cbln1          | -3.95 | -3.85 | -4.47 |
| ENSRNOG00000059705 | Elmo1          | -4.09 | -3.84 | -4.06 |
| ENSRNOG00000006509 | Srgap3         | -4.22 | -3.81 | -4.69 |



|                    |                |       |       |       |
|--------------------|----------------|-------|-------|-------|
| ENSRNOG00000038835 | Cd86           | -4.29 | -3.80 | -4.31 |
| ENSRNOG00000029244 | Pcdhb10        | -5.13 | -3.79 | -4.65 |
| ENSRNOG00000037275 | Tlcd2          | -4.12 | -3.79 | -4.58 |
| ENSRNOG00000051802 | AABR07010609.1 | -4.83 | -3.77 | -4.88 |
| ENSRNOG00000006783 | Neb            | -4.90 | -3.73 | -4.15 |
| ENSRNOG00000026582 | RGD1310212     | -3.64 | -3.71 | -3.99 |
| ENSRNOG00000051664 | AABR07010878.1 | -4.54 | -3.70 | -4.63 |
| ENSRNOG00000058766 | AABR07019341.2 | -4.22 | -3.69 | -4.29 |
| ENSRNOG00000061317 | AABR07011733.1 | -4.73 | -3.69 | -4.83 |
| ENSRNOG00000052304 | AC096201.1     | -4.66 | -3.67 | -4.92 |
| ENSRNOG00000046332 | AABR07004812.1 | -4.82 | -3.62 | -4.55 |
| ENSRNOG00000028548 | Ccl9           | -4.18 | -3.60 | -4.66 |
| ENSRNOG00000060998 | AABR07029467.2 | -4.31 | -3.60 | -4.34 |
| ENSRNOG00000010975 | Adnp           | -3.38 | -3.58 | -3.42 |
| ENSRNOG00000059588 | AC113785.2     | -4.33 | -3.55 | -4.32 |
| ENSRNOG00000014137 | Fbln1          | -3.20 | -3.54 | -4.02 |
| ENSRNOG00000015133 | Kmt2a          | -3.88 | -3.48 | -4.03 |
| ENSRNOG00000031951 | LOC100361645   | -4.38 | -3.48 | -4.41 |
| ENSRNOG00000016848 | Fzd4           | -3.97 | -3.48 | -3.99 |
| ENSRNOG00000031579 | LOC100363469   | -4.22 | -3.47 | -4.43 |
| ENSRNOG00000025648 | Dhrs711        | -4.13 | -3.43 | -4.40 |
| ENSRNOG00000051932 | AABR07016635.1 | -4.89 | -3.41 | -4.46 |
| ENSRNOG00000010889 | Fbxw7          | -3.73 | -3.39 | -3.09 |
| ENSRNOG00000009826 | Bche           | -3.59 | -3.29 | -3.62 |
| ENSRNOG00000000113 | Elac1          | -3.27 | -3.28 | -3.45 |
| ENSRNOG00000034134 | Cpm            | -3.23 | -3.27 | -3.55 |
| ENSRNOG00000013004 | Akr1d1         | -4.61 | -3.27 | -3.60 |
| ENSRNOG00000059145 | AABR07026137.2 | -4.24 | -3.26 | -4.33 |
| ENSRNOG00000001271 | Card6          | -3.50 | -3.24 | -3.76 |
| ENSRNOG00000059322 | N4bp211        | -3.51 | -3.23 | -3.84 |
| ENSRNOG00000036726 | Cd300e         | -4.11 | -3.22 | -3.54 |
| ENSRNOG00000004697 | Baalc          | -3.49 | -3.22 | -3.72 |
| ENSRNOG00000019590 | Smg5           | -3.77 | -3.22 | -4.09 |
| ENSRNOG00000046353 | LOC501406      | -3.07 | -3.20 | -2.81 |
| ENSRNOG00000005871 | Il1rn          | -3.44 | -3.19 | -3.09 |
| ENSRNOG00000027468 | Slc6a15        | -3.25 | -3.19 | -3.90 |
| ENSRNOG00000042741 | Adgb           | -3.55 | -3.19 | -3.32 |
| ENSRNOG00000036604 | Ifit2          | -2.76 | -3.17 | -3.13 |
| ENSRNOG00000020444 | Hcn3           | -3.60 | -3.16 | -3.96 |
| ENSRNOG00000048904 | AABR07004232.1 | -3.82 | -3.15 | -3.92 |
| ENSRNOG00000018839 | Ntrk2          | -3.41 | -3.12 | -3.45 |
| ENSRNOG00000059252 | AABR07057108.1 | -4.13 | -3.08 | -3.95 |
| ENSRNOG00000052847 | AABR07025673.1 | -3.70 | -3.04 | -4.03 |
| ENSRNOG00000014452 | Zfhx3          | -2.70 | -3.02 | -3.12 |

|                     |                |       |       |       |
|---------------------|----------------|-------|-------|-------|
| ENSRNOG00000006649  | Thrb           | -3.58 | -3.00 | -3.11 |
| ENSRNOG000000011991 | Slc10a7        | -2.76 | -2.98 | -2.99 |
| ENSRNOG000000060742 | AABR07029809.1 | -4.03 | -2.97 | -4.00 |
| ENSRNOG000000007548 | Polr3f         | -3.09 | -2.95 | -3.16 |
| ENSRNOG000000050205 | Afmid          | -3.28 | -2.94 | -3.54 |
| ENSRNOG000000030870 | LOC102550396   | -3.93 | -2.94 | -3.78 |
| ENSRNOG000000048762 | AABR07000534.1 | -4.20 | -2.90 | -3.90 |
| ENSRNOG000000051390 | AABR07035064.1 | -3.63 | -2.89 | -3.48 |
| ENSRNOG000000057986 | AABR07034980.2 | -3.63 | -2.89 | -3.48 |
| ENSRNOG000000046647 | Impad1         | -2.78 | -2.86 | -3.06 |
| ENSRNOG000000000456 | Psmb8          | -3.21 | -2.84 | -3.05 |
| ENSRNOG000000012439 | Bid            | -3.05 | -2.81 | -3.36 |
| ENSRNOG000000036842 | Smug1          | -2.84 | -2.68 | -2.82 |
| ENSRNOG000000005904 | Cdc27          | -2.48 | -2.67 | -2.84 |
| ENSRNOG000000058408 | AC108588.1     | -3.75 | -2.66 | -3.52 |
| ENSRNOG000000015517 | Zfp444         | -2.96 | -2.66 | -2.66 |
| ENSRNOG000000017066 | Zfp384         | -2.62 | -2.65 | -2.63 |
| ENSRNOG000000014288 | Fn1            | -2.70 | -2.65 | -3.06 |
| ENSRNOG000000002866 | Rassf6         | -2.90 | -2.63 | -2.51 |
| ENSRNOG000000011829 | Rpgrip11       | -2.55 | -2.59 | -2.53 |
| ENSRNOG000000037251 | Zfp248         | -2.55 | -2.57 | -2.69 |
| ENSRNOG000000024120 | Rxfp1          | -2.79 | -2.55 | -3.09 |
| ENSRNOG00000001548  | Nfe2l2         | -2.37 | -2.50 | -2.52 |
| ENSRNOG000000013521 | Dhfr           | -2.41 | -2.47 | -2.74 |
| ENSRNOG000000003132 | Mip            | -2.36 | -2.40 | -2.97 |
| ENSRNOG000000008908 | Slc35a1        | -2.70 | -2.32 | -2.93 |
| ENSRNOG000000027434 | Fitm2          | -2.46 | -2.29 | -2.49 |
| ENSRNOG000000013624 | Uevld          | -2.70 | -2.28 | -2.83 |
| ENSRNOG000000017672 | Akr1c14        | -2.49 | -1.93 | -2.51 |
| ENSRNOG000000003160 | RragB          | 4.67  | 5.03  | 4.59  |

**Supplementary Figure 1.** Weight monitoring of F0 female rats and F1 - F4 male offspring. The weight of the animals was closely monitored trice a week to ensure animal welfare. Mean weight is shown over time.

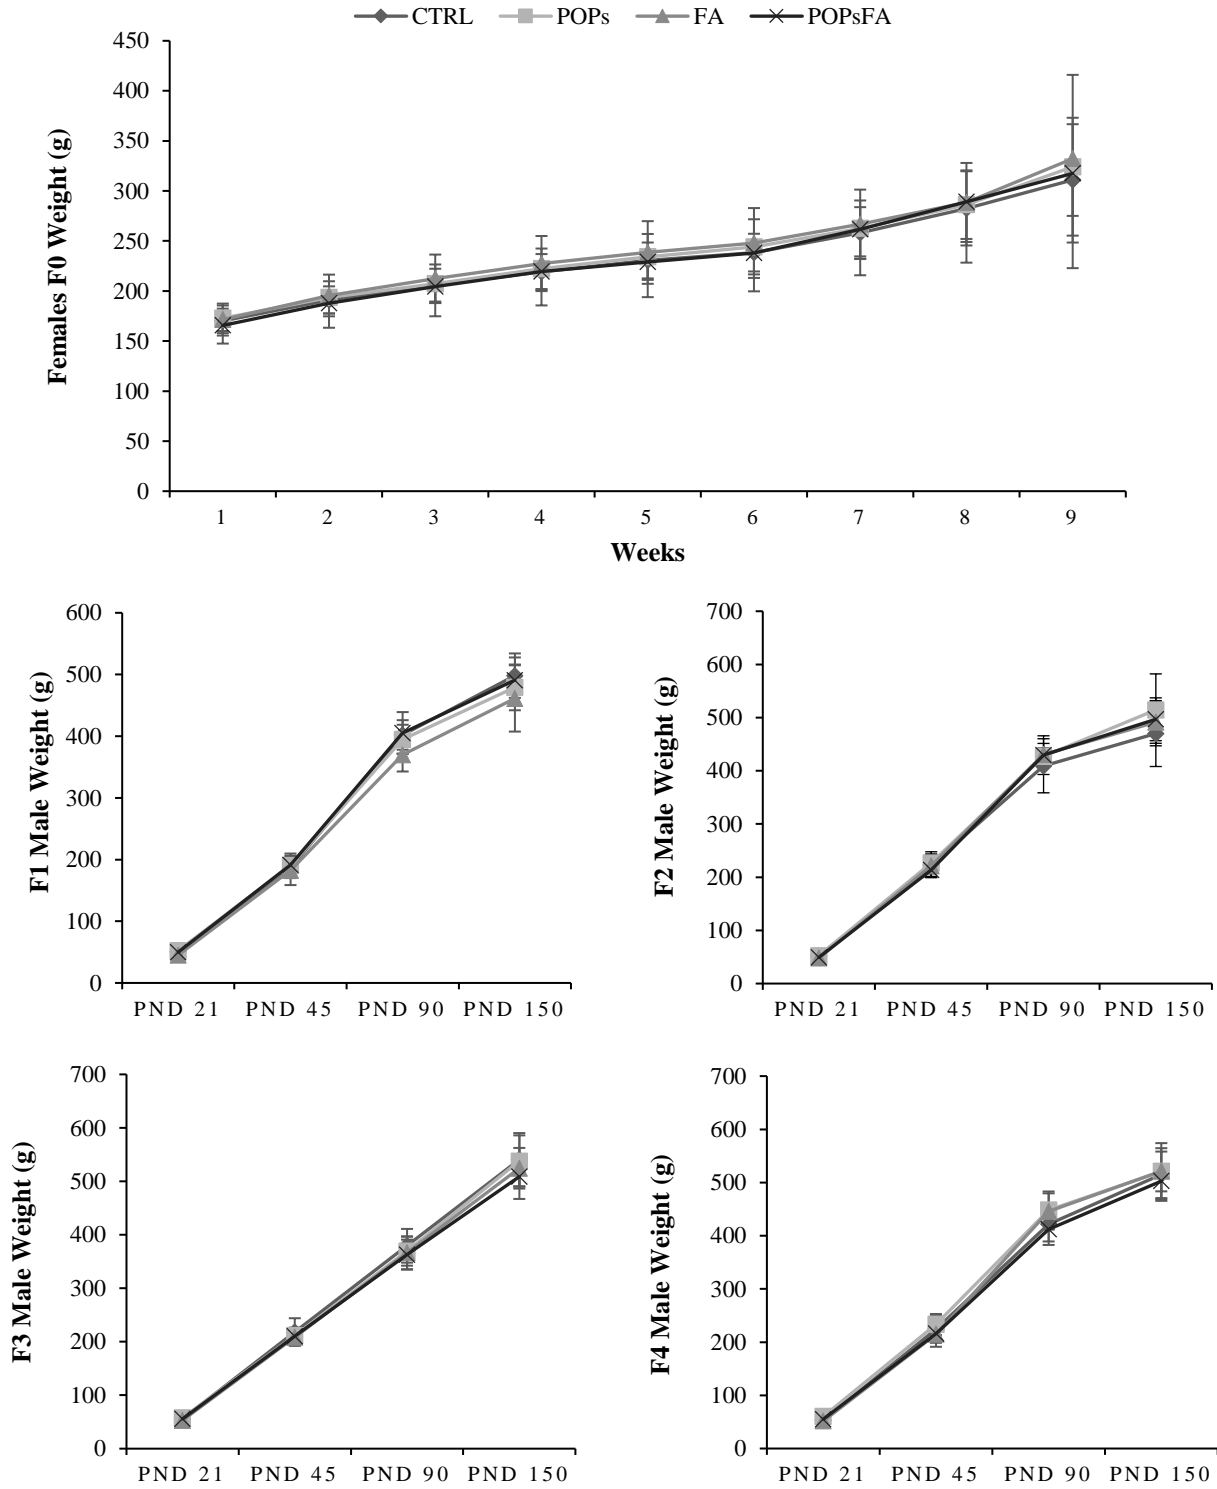

Supplement: 41598_2019_50060_MOESM1_ESM.pdf [file 41598_2019_50060_MOESM1_ESM.pdf]
